# Supplementary material for: VASP: A Volumetric Analysis of Surface Properties Yields Insights into Protein-Ligand Binding Specificity
Source: PLoS Comput Biol. 2010 Aug 12;6(8):e1000881. doi: 10.1371/journal.pcbi.1000881 (PMC2930297; doi:10.1371/journal.pcbi.1000881)
Supplement: Text S1 — Pseudocode describing Marching Cubes and an application of the Surveyor's Formula. (0.04 MB DOC) [file pcbi.1000881.s012.doc]

**Text S1: Pseudocode**

**a) Marching Cubes**

The pseudocode below describes an application of Marching Cubes for representing the volumetric union, intersection, or difference of two closed triangular meshes. Several subroutines are described as well, for simplicity.

For clarity, one simple optimization was left out of the ***ISINSIDE()*** subroutine: The triangles of the surface ***A*** can be persistently associated with cubes on a uniform grid, and raytesting can first identify the grid cubes that intersect the ray before testing the triangles associated with each cube. This eliminates the need to test many triangles.

**ALGORITHM: Marching Cubes**

**Input:** Closed surface A

**Input:** Closed surface B

**Input:** CSG_OP, one of {UNION, INTERSECTION,DIFFERENCE}

**Input:** Resolution r

let L be an axis-aligned lattice of cubes with sidelength r

let T be an empty list of triangles

**for** each lattice point p in L do

let pA = ***ISINSIDE***(A, p, r)

let pB = ***ISINSIDE***(B, p, r)

let pOUT = ***CSG_STATE***(CSG_OP, pA, pB)

**end for**

**for** each lattice segment e in L do

let points p1 and p2 be endpoints of e

**if** (p1OUT ≠ p2OUT then)

set edge point p0 = ***INT_POINT***(CSG_OP, A, B, p1, p2)

**end if**

**end for**

**for** each cube c in L do

let P = {p0, p1, . . . , p7} be corners of c

let E = {e0, e1, . . . , } be edge points of any segment of c

let triangles t = LOOKUP(P, E)

append t to T

**end for**

**Output:** T, the output boundary surface

***ISINSIDE***(A, p, r)

**Input:** Closed surface A

**Input:** point p

let R be a randomly oriented ray originating at p

let L be an axis-aligned lattice of cubes with sidelength r

let pointList be an empty list of points

**for** each triangle t in A that intersects R do

let pi be the point of intersection between t and R

**if** pi is not already an element of pointList then

add pi to pointList

**end if**

**end for**

**if** the size of pointList is even then

**Output:** false, p is outside A

**else**

**Output:** true, p is inside A

**end if**

***CSG_STATE***(CSG_OP, pA, pB)

**Input:** CSG_OP, one of {UNION, INTERSECTION,DIFFERENCE}

**Input:** pA, true if p is inside surface A, false otherwise.

**Input:** pB, true if p is inside surface B, false otherwise.

let the bool result = false

**if** CSG_OP = UNION and pA = true or pB = true then

set result = true

**end if**

**if** CSG_OP = INTERSECTION and pA = true and pB = true then

set result = true

**end if**

**if** CSG_OP = DIFFERENCE and pA = true and pB = false then

set result = true

**end if**

**Output:** result

***INT_POINT***(CSG_OP, A, B, p1, p2)

**Input:** CSG_OP, one of {UNION, INTERSECTION,DIFFERENCE}

**Input:** the surfaces A, B

**Input:** p1, p2, endpoints of the lattice segment e.

Either p1 is p2 is inside the output surface.

Assume without loss of generality that p1 is inside the output surface.

let pa be the point where e intersects A

let pb be the point where e intersects B

**if** either pa or pb does not exist then

**Output:** pb or pa, the one that does exist.

**else**

**if** CSG_OP = UNION then

**Output:** pa or pb, whichever is further from p1.

**end if**

**if** CSG_OP = INTERSECTION or DIFFERENCE then

**Output:** pa or pb, whichever is closer to p1.

**end if**

***LOOKUP***(P, E)

**Input:** P, the inside/outside state of the 8 lattice cube corners.

**Input:** E, intersection points on lattice segments of the cube.

See reference [29] for the lookup table that generates triangles for every cube state.

**Output:** Triangles t that approximate the output surface in the cube.

**b) Surveyor's Formula**

The pseudocode below describes an application of The Surveyor's Formula for computing the volume of the region within a closed triangular mesh.

**ALGORITHM: Surveyor’s Formula**

**Input:** Triangular Polyhedral boundary SA

let c be the centroid of all points in SA

let V = 0

**for** each triangle t in SA do

let the corners of t = {t1, t2, t3}

let tetrahedron T = {t1, t2, t3, c}

let tc be the centroid of t

let tn be the normal of t, which faces away from the interior of SA

let d = DOT_PRODUCT(tn, tc − c), the standard dot product

**if** d < 0 then

set V = V − v(T)

**end if**

**if** d > 0 then

set V = V + v(T)

**end if**

**end for**

**Output:** V, the volume within SA
